# Supplementary material for: Nuclear Gene Variation in Wild Brown Rats
Source: PubMed Central journal article supplement (PMC3516487; doi:10.1534/g3.112.004713), 2012-12-01
Supplement: supp_2.12.1661_004713SI.pdf [file supp_2.12.1661_004713SI.pdf]

**Supplementary Table S1.** Table of locations of the 29 rats sampled for this study from China (CH) and the United Kingdom (UK).

| <b>Sample ID</b> | <b>Country</b> | <b>Latitude</b> | <b>Longitude</b> |
|------------------|----------------|-----------------|------------------|
| CH01             | China          | 45.8884         | 126.6291         |
| CH02             | China          | 45.6183         | 126.5849         |
| CH03             | China          | 45.8826         | 126.5691         |
| CH04             | China          | 45.6797         | 126.6097         |
| CH05             | China          | 45.6194         | 126.5869         |
| CH06             | China          | 45.8258         | 126.7839         |
| CH07             | China          | 45.8265         | 126.7839         |
| CH08             | China          | 45.8112         | 126.7688         |
| CH09             | China          | 45.6856         | 126.6347         |
| CH10             | China          | 45.6856         | 126.6329         |
| CH11             | China          | 45.6859         | 126.6379         |
| CH12             | China          | 45.6391         | 126.6678         |
| CH13             | China          | 45.6175         | 126.6749         |
| CH14             | China          | 45.8744         | 126.5711         |
| CH15             | China          | 45.8826         | 126.5698         |
| CH16             | China          | 45.8825         | 126.5684         |
| CH17             | China          | 45.6564         | 126.5931         |
| CH18             | China          | 45.6601         | 126.5996         |
| CH19             | China          | 45.6313         | 126.6160         |
| CH20             | China          | 45.6818         | 126.6159         |
| CH21             | China          | 45.6759         | 126.6146         |
| CH22             | China          | 45.6559         | 126.6008         |
| UK01             | United Kingdom | 55.9429         | -2.7934          |

|      |                |         |         |
|------|----------------|---------|---------|
| UK02 | United Kingdom | 55.9438 | -3.1810 |
| UK03 | United Kingdom | 56.0260 | -3.7914 |
| UK04 | United Kingdom | 55.5870 | -1.6784 |
| UK05 | United Kingdom | 55.8593 | -4.2410 |
| UK06 | United Kingdom | 55.9321 | -2.3607 |
| UK07 | United Kingdom | 55.8691 | -2.9728 |

---

**Supplementary Table S2.** Table of loci used in this study. Including their coordinates in the Rat reference genome (RN4), Gene ID, size and primers.

| Locus ID | Ensembl Gene ID    | Chromosome | RN4 Coords of Gene |           | Left Primer Coords | Right Primer Coords | Primer Product Size | PrimerF<br>PrimerR |
|----------|--------------------|------------|--------------------|-----------|--------------------|---------------------|---------------------|--------------------|
|          |                    |            |                    |           |                    |                     |                     |                    |
| chr_1A   | ENSRNOG00000025400 | 1          | 180753943          | 180753411 | 180753945          |                     | 180754475           | 530                |
| chr_1B   | ENSRNOG00000019309 | 1          | 182152992          | 182152441 | 182152992          |                     | 182153543           | 551                |
| chr_2A   | ENSRNOG00000018488 | 2          | 148040390          | 148039733 | 148040421          |                     | 148041048           | 627                |
| chr_2B   | ENSRNOG00000022625 | 2          | 213687099          | 213686582 | 213687102          |                     | 213687602           | 500                |
| chr_3A   | ENSRNOG00000010054 | 3          | 158051358          | 158050795 | 158051370          |                     | 158051922           | 552                |
| chr_4A   | ENSRNOG00000011808 | 4          | 84148687           | 84148047  | 84148695           |                     | 84149287            | 592                |
| chr_5A   | ENSRNOG00000017577 | 5          | 149279682          | 149279137 | 149279698          |                     | 149280222           | 524                |
| chr_6A   | ENSRNOG00000009491 | 6          | 42780020           | 42779490  | 42780033           |                     | 42780551            | 518                |
| chr_7A   | ENSRNOG00000026916 | 7          | 10166609           | 10165710  | 10166680           |                     | 10167476            | 796                |
| chr_8A   | ENSRNOG00000028360 | 8          | 20266352           | 20265666  | 20266378           |                     | 20267024            | 646                |
| chr_8B   | ENSRNOG00000018467 | 8          | 65486515           | 65485758  | 65486557           |                     | 65487271            | 714                |
| chr_9A   | ENSRNOG00000022822 | 9          | 83962763           | 83962253  | 83962768           |                     | 83963271            | 503                |
| chr_10A  | ENSRNOG00000027770 | 10         | 90289908           | 90289298  | 90289910           |                     | 90290452            | 542                |
| chr_11A  | ENSRNOG00000050701 | 11         | 17241547           | 17241022  | 17241550           |                     | 17242066            | 516                |
| chr_12A  | ENSRNOG00000001961 | 12         | 22079134           | 22078629  | 22079136           |                     | 22079636            | 500                |
| chr_13A  | ENSRNOG00000010113 | 13         | 88312987           | 88312306  | 88313007           |                     | 88313657            | 650                |
| chr_13B  | ENSRNOG00000004319 | 13         | 98243546           | 98243027  | 98243546           |                     | 98244063            | 517                |

|         |                    |    |           |           |           |           |      |
|---------|--------------------|----|-----------|-----------|-----------|-----------|------|
| chr_14A | ENSRNOG00000004153 | 14 | 20042681  | 20041856  | 20042717  | 20043496  | 779  |
| chr_14B | ENSRNOG00000011338 | 14 | 87950754  | 87950222  | 87950775  | 87951287  | 512  |
| chr_15A | ENSRNOG00000012300 | 15 | 3826966   | 3826341   | 3827068   | 3827579   | 511  |
| chr_16A | ENSRNOG00000013291 | 16 | 6444261   | 6443746   | 6444264   | 6444764   | 500  |
| chr_17A | ENSRNOG00000016992 | 17 | 96817220  | 96816641  | 96817250  | 96817784  | 534  |
| chr_18A | ENSRNOG00000023433 | 18 | 77151516  | 77150736  | 77151530  | 77152289  | 759  |
| chr_19A | ENSRNOG00000020859 | 19 | 49814030  | 49813487  | 49814040  | 49814562  | 522  |
| chr_20A | ENSRNOG00000059548 | 20 | 5175027   | 5174427   | 5175028   | 5175606   | 578  |
| chr_1C  | ENSRNOG00000013945 | 1  | 82306314  | 82305178  | 82306646  | 82307408  | 762  |
| chr_2C  | ENSRNOG00000043292 | 2  | 42586965  | 42585838  | 42587155  | 42587929  | 774  |
| chr_3B  | ENSRNOG00000043045 | 3  | 52696860  | 52695718  | 52697161  | 52697956  | 795  |
| chr_4B  | ENSRNOG00000008870 | 4  | 173567443 | 173566199 | 173567623 | 173568429 | 806  |
| chr_5B  | ENSRNOG00000017523 | 5  | 167097250 | 167095890 | 167097348 | 167098198 | 850  |
| chr_6B  | ENSRNOG00000024310 | 6  | 40912533  | 40911055  | 40912757  | 40913528  | 771  |
| chr_7B  | ENSRNOG00000024998 | 7  | 87035949  | 87035023  | 87036105  | 87036867  | 762  |
| chr_8C  | ENSRNOG00000013171 | 8  | 111845569 | 111844732 | 111845635 | 111846398 | 763  |
| chr_9B  | ENSRNOG00000012663 | 9  | 45781694  | 45780154  | 45781958  | 45782752  | 794  |
| chr_10B | ENSRNOG00000003217 | 10 | 108389551 | 108388459 | 108389700 | 108390551 | 851  |
| chr_11B | ENSRNOG00000000716 | 11 | 2261687   | 2260590   | 2261726   | 2262526   | 800  |
| chr_12B | ENSRNOG00000042213 | 12 | 9641141   | 9640315   | 9641191   | 9641941   | 750  |
| chr_13C | ENSRNOG00000009691 | 13 | 45837708  | 45835522  | 45837827  | 45838897  | 1070 |

|         |                     |    |           |           |           |           |     |
|---------|---------------------|----|-----------|-----------|-----------|-----------|-----|
| chr_14C | ENSRNOG00000003067  | 14 | 20042681  | 20041859  | 20042717  | 20043496  | 779 |
| chr_15B | ENSRNOG000000037884 | 15 | 105090728 | 105089718 | 105090826 | 105091635 | 809 |
| chr_16B | ENSRNOG000000014185 | 16 | 24921447  | 24919567  | 24922466  | 24923299  | 833 |
| chr_17B | ENSRNOG000000018661 | 17 | 51250572  | 51249634  | 51250586  | 51251317  | 731 |
| chr_18B | ENSRNOG000000019799 | 18 | 30717036  | 30714601  | 30717555  | 30718408  | 853 |
| chr_19B | ENSRNOG000000039152 | 19 | 29215911  | 29212636  | 29217221  | 29217973  | 752 |
| chr_20B | ENSRNOG000000006640 | 20 | 21886336  | 21885096  | 21886431  | 21887092  | 661 |
