# Supplementary material for: Nuclear Gene Variation in Wild Brown Rats
Source: PubMed Central journal article supplement (PMC3516487; doi:10.1534/g3.112.004713), 2012-12-01
Supplement: supp_2.12.1661_TableS1.pdf [file supp_2.12.1661_TableS1.pdf]

**Supplementary Table S1.** Table of locations of the 29 rats sampled for this study from China (CH) and the United Kingdom (UK).

| <b>Sample ID</b> | <b>Country</b> | <b>Latitude</b> | <b>Longitude</b> |
|------------------|----------------|-----------------|------------------|
| CH01             | China          | 45.8884         | 126.6291         |
| CH02             | China          | 45.6183         | 126.5849         |
| CH03             | China          | 45.8826         | 126.5691         |
| CH04             | China          | 45.6797         | 126.6097         |
| CH05             | China          | 45.6194         | 126.5869         |
| CH06             | China          | 45.8258         | 126.7839         |
| CH07             | China          | 45.8265         | 126.7839         |
| CH08             | China          | 45.8112         | 126.7688         |
| CH09             | China          | 45.6856         | 126.6347         |
| CH10             | China          | 45.6856         | 126.6329         |
| CH11             | China          | 45.6859         | 126.6379         |
| CH12             | China          | 45.6391         | 126.6678         |
| CH13             | China          | 45.6175         | 126.6749         |
| CH14             | China          | 45.8744         | 126.5711         |
| CH15             | China          | 45.8826         | 126.5698         |
| CH16             | China          | 45.8825         | 126.5684         |
| CH17             | China          | 45.6564         | 126.5931         |
| CH18             | China          | 45.6601         | 126.5996         |
| CH19             | China          | 45.6313         | 126.6160         |
| CH20             | China          | 45.6818         | 126.6159         |
| CH21             | China          | 45.6759         | 126.6146         |
| CH22             | China          | 45.6559         | 126.6008         |
| UK01             | United Kingdom | 55.9429         | -2.7934          |

|      |                |         |         |
|------|----------------|---------|---------|
| UK02 | United Kingdom | 55.9438 | -3.1810 |
| UK03 | United Kingdom | 56.0260 | -3.7914 |
| UK04 | United Kingdom | 55.5870 | -1.6784 |
| UK05 | United Kingdom | 55.8593 | -4.2410 |
| UK06 | United Kingdom | 55.9321 | -2.3607 |
| UK07 | United Kingdom | 55.8691 | -2.9728 |

---
